# Supplementary material for: Thermoplastic, redox recyclable silicone–lipoamide elastomers
Source: Royal Society of Chemistry journal article supplement (doi:10.1039/d3gc03733a), 2023-01-01
Supplement: d3gc03733a1.pdf [file d3gc03733a1.pdf]

## Thermoplastic, Redox Recyclable Silicone-Lipoamide Elastomers

Muhammad Ebad Noman, Sijia Zheng,<sup>b</sup>Haiyan Xue and Michael A. Brook\*

### Supporting Information

|                                                                                                                                                                                      |    |
|--------------------------------------------------------------------------------------------------------------------------------------------------------------------------------------|----|
| TABLE S1. SYNTHESIS OF LIPOAMIDE SILICONE COPOLYMERS. ....                                                                                                                           | 2  |
| TABLE S2. DSC TRACES OF LPA-APS ELASTOMERS. <sup>A</sup> .....                                                                                                                       | 3  |
| TABLE S3. TIME FOR ELASTOMERS TO REFORM WHEN DISPLAYING THERMOPLASTIC BEHAVIOR. ....                                                                                                 | 5  |
| TABLE S4. REDUCTIVE ELASTOMER DEGRADATION WITH 1,4-DITHIOETHERITOL.....                                                                                                              | 5  |
| FIGURE S1. GPC RESULTS OF LPA+BUTYLAMINE ELASTOMER <b>BuL-P</b> IN THF. ....                                                                                                         | 6  |
| FIGURE S2. CONFIRMS THE COMPLETE REACTION OF LPA + BUTYLAMINE: (A) <sup>1</sup> H NMR OF LPA STARTING MATERIAL, (B) <sup>1</sup> H NMR OF LPA + BUTYLAMINE PRODUCT <b>BuL</b> . .... | 6  |
| FIGURE S3. <sup>1</sup> H NMR COMPARISON OF LPA (A), APS(B) AND LPA-APS COPOLYMER(C). ....                                                                                           | 7  |
| FIGURE S4. NMR OF <b>T8L</b> , LIQUID VS ELASTOMER. ....                                                                                                                             | 7  |
| FIGURE S5. NMR OF PENDENT LPA-APS CO-POLYMER (BEFORE AN ELASTOMER HAD FORMED, WITHIN 10 MINUTES OF REACTION). ....                                                                   | 8  |
| FIGURE S6. NMR OF TELECHELIC LPA-APS CO-POLYMER (BEFORE AN ELASTOMER HAD FORMED, WITHIN 10 MINUTES OF REACTION). ....                                                                | 9  |
| FIGURE S7. NMR OF SIMPLE SILANES LPA-APS CO-POLYMER (BEFORE AN ELASTOMER HAD FORMED, WITHIN 10 MINUTES OF REACTION). ....                                                            | 9  |
| FIGURE S8. IR OF LPA VS LPA-APS ELASTOMER DISPLAYS THE SHIFT IN THE CARBONYL PEAK. ....                                                                                              | 10 |
| FIGURE S9. TGA OF PENDENT LPA-APS ELASTOMERS. ....                                                                                                                                   | 10 |
| FIGURE S10. TGA OF TELECHELIC LPA-APS ELASTOMERS. ....                                                                                                                               | 11 |
| FIGURE S11. SHORE HARDNESS OF LINEAR LPA-APS ELASTOMERS; HEATING AT MELTING POINT FOR 10 MIN.....                                                                                    | 11 |
| FIGURE S12. SHORE HARDNESS OF PENDENT LPA-APS ELASTOMERS; HEATING AT MELTING POINT FOR 10 MIN. ....                                                                                  | 12 |
| FIGURE S13. NMR OF A LINEAR TELECHELIC LPA-APS COPOLYMER ( <b>T8L</b> , BEFORE IT FORMS AN ELASTOMER) BEFORE AND AFTER HEATING. ....                                                 | 12 |
| FIGURE S14. COMPARISON OF THE TGA OF LPA-APS ( <b>P10L</b> ) BEFORE AND AFTER HEATING.....                                                                                           | 13 |
| FIGURE S15. COMPARISON OF THE TGA OF A TELECHELIC LPA-APS ( <b>T8L</b> ) BEFORE AND AFTER HEATING.....                                                                               | 13 |
| FIGURE S16. A: ELONGATION AT BREAK AND YOUNG'S MODULUS (TENSILE) OF <b>T8L</b> BEFORE AND AFTER HEATING AT THE MELTING POINT (187 °C) FOR 10 MIN.....                                | 14 |
| FIGURE S17. NMR OF DTT, LPA-APS (TELECHELIC) ELASTOMER AND ELASTOMER + DTT NMR. ....                                                                                                 | 15 |
| FIGURE S18. GPC RESULTS OF LPA-APS (TELECHELIC) ELASTOMER + DTT PRODUCT.....                                                                                                         | 15 |
| FIGURE S19. COMPARISON OF LPA-APS ELASTOMER BEFORE AND AFTER DEGRADATION WITH DTT. ....                                                                                              | 16 |
| FIGURE S20. TGA RESULTS OF <b>T8L</b> ELASTOMER VS <b>T8L</b> +DTT ELASTOMER. ....                                                                                                   | 17 |

Table S1. Synthesis of Lipoamide Silicone Copolymers.

|            | <b>LPA g (mmol)</b> | <b>CDI g (mmol)</b> | <b>APS g (mmol)</b> | <b>Functional<br/>group<br/>equivalents<br/>[LPA]/[APS]</b> | <b>% Yield</b> |
|------------|---------------------|---------------------|---------------------|-------------------------------------------------------------|----------------|
| <b>S1</b>  | 0.4992 (2.42)       | 0.4048 (2.5)        | 0.4353 (2.42)       | 1:1                                                         | 90             |
| <b>S3</b>  | 0.5027 (2.42)       | 0.4045 (2.5)        | 0.8610 (2.42)       | 1:1                                                         | 79             |
| <b>T0</b>  | 0.5043 (2.42)       | 0.4063 (2.5)        | 0.3022 (1.21)       | 1:1                                                         | 86             |
| <b>T8</b>  | 0.5003 (2.42)       | 0.4047 (2.5)        | 1.0911 (1.21)       | 1:1                                                         | 86             |
| <b>T9</b>  | 0.5028 (2.42)       | 0.4041 (2.5)        | 1.2163 (1.21)       | 1:1                                                         | 86             |
| <b>T37</b> | 0.5030 (2.42)       | 0.4049 (2.5)        | 3.6300 (1.21)       | 1:1                                                         | 75             |
| <b>P2</b>  | 0.2522 (1.22)       | 0.2012 (1.25)       | 6.6685 (1.21)       | 1:1                                                         | 88             |
| <b>P4</b>  | 0.5017 (2.42)       | 0.4043 (2.5)        | 5.1630 (2.42)       | 1:1                                                         | 79             |
| <b>P10</b> | 0.5000 (2.42)       | 0.4045 (2.5)        | 2.2301 (2.42)       | 1:1                                                         | 92             |
| <b>P20</b> | 0.4997 (2.42)       | 0.4063 (2.5)        | 0.9920 (2.42)       | 1:1                                                         | 96             |

Table S2. DSC traces of LPA-APS elastomers.<sup>a</sup>

| LPA-APS elastomer | DSC                                                                                | LPA-APS elastomer | DSC                                                                                  |
|-------------------|------------------------------------------------------------------------------------|-------------------|--------------------------------------------------------------------------------------|
| <b>S1L</b>        | 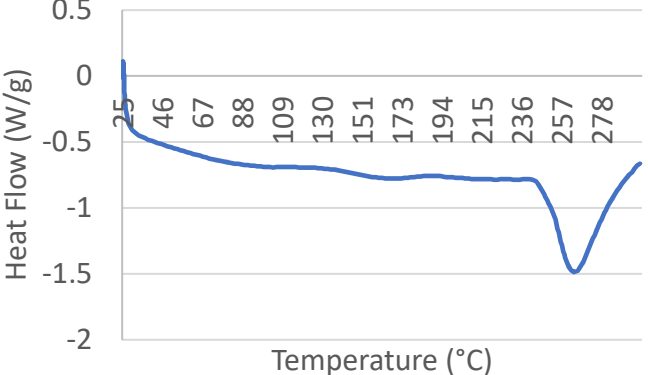 | <b>S3L</b>        |   |
| <b>TOL</b>        |  | <b>T8L, T9L</b>   |  |

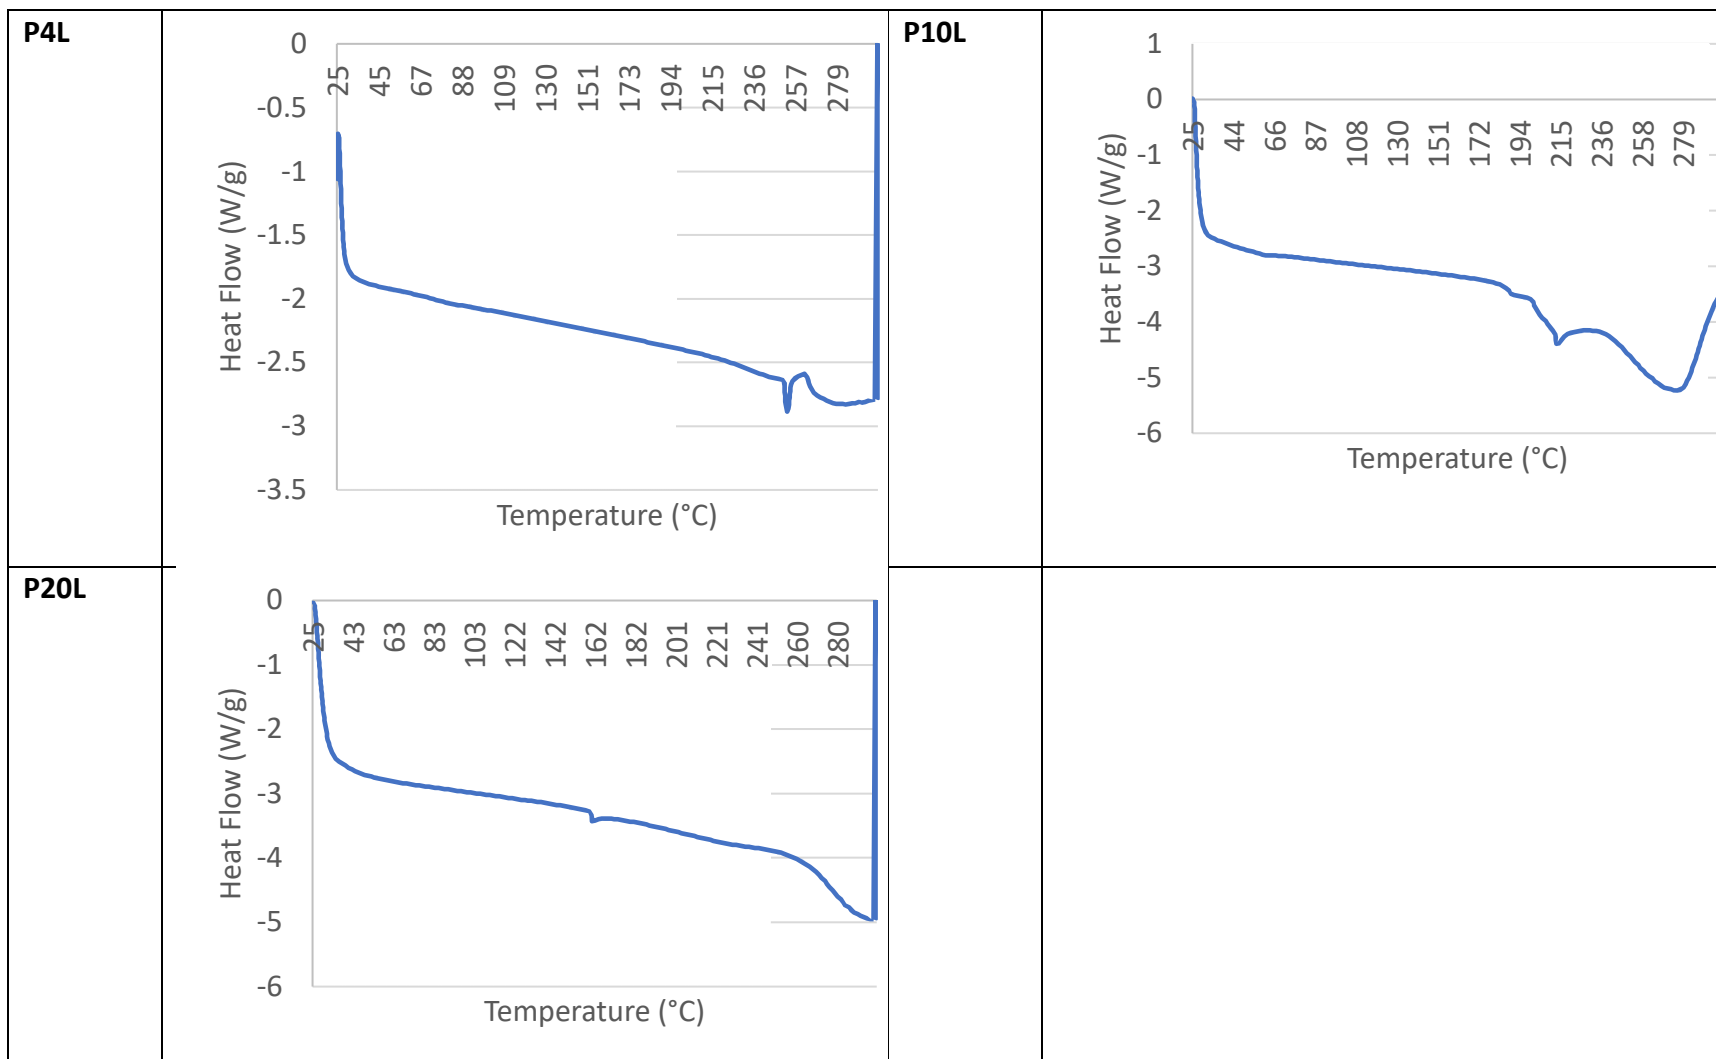

<sup>a</sup> DSC analyses were not performed on **T37** and **P2** since they did not form elastomers.

Table S3. Time for elastomers to reform when displaying thermoplastic behavior.

| LPA-APS elastomer       | Melting Temperature (°C) | Time to reform Elastomer |
|-------------------------|--------------------------|--------------------------|
| <b>S1L</b>              | 165                      | 3 days                   |
| <b>S3L</b>              | 197                      | 1 day                    |
| <b>T0L</b>              | 186                      | 1 days                   |
| <b>T8L</b>              | 188                      | 10 min                   |
| <b>T9L</b>              | 197                      | 2-5 days                 |
| <b>T37L<sup>a</sup></b> | -                        | -                        |
| <b>P2L<sup>a</sup></b>  | -                        | -                        |
| <b>P4L</b>              | 254                      | 10 min                   |
| <b>P10L</b>             | 216                      | 2 hrs                    |
| <b>P20L</b>             | 160                      | 4 hrs                    |

<sup>a</sup> **T37L** and **P2L** were not tested for thermoplastic behaviour since they did not form elastomers.

Table S4. Reductive elastomer degradation with 1,4-dithiotheritol.

|                         | LPA-APS elastomer<br>mg (mmol) | DTT mg (mmol) | Functional group<br>equivalents<br>[LPA]/[APS] |
|-------------------------|--------------------------------|---------------|------------------------------------------------|
| <b>S1L</b>              | 98.2 (0.26)                    | 98.2 (0.26)   | 1:1                                            |
| <b>S3L</b>              | 100.0 (0.18)                   | 27.6 (0.18)   | 1:1                                            |
| <b>T0L</b>              | 97.2 (0.21)                    | 33.1 (0.21)   | 1:1                                            |
| <b>T8L</b>              | 101.9 (0.16)                   | 24.0 (0.16)   | 1:1                                            |
| <b>T9L</b>              | 99.7 (0.14)                    | 21.9 (0.14)   | 1:1                                            |
| <b>T37L<sup>a</sup></b> | -                              | -             | -                                              |
| <b>P2L<sup>a</sup></b>  | -                              | -             | -                                              |
| <b>P4L</b>              | 100.2 (0.04)                   | 6.8 (0.04)    | 1:1                                            |
| <b>P10L</b>             | 100.1 (0.09)                   | 13.8 (0.09)   | 1:1                                            |
| <b>P20L</b>             | 101.0 (0.17)                   | 26.0 (0.17)   | 1:1                                            |

<sup>a</sup> **T37L** and **P2L** did not form elastomers; no change was observed during this experiment.

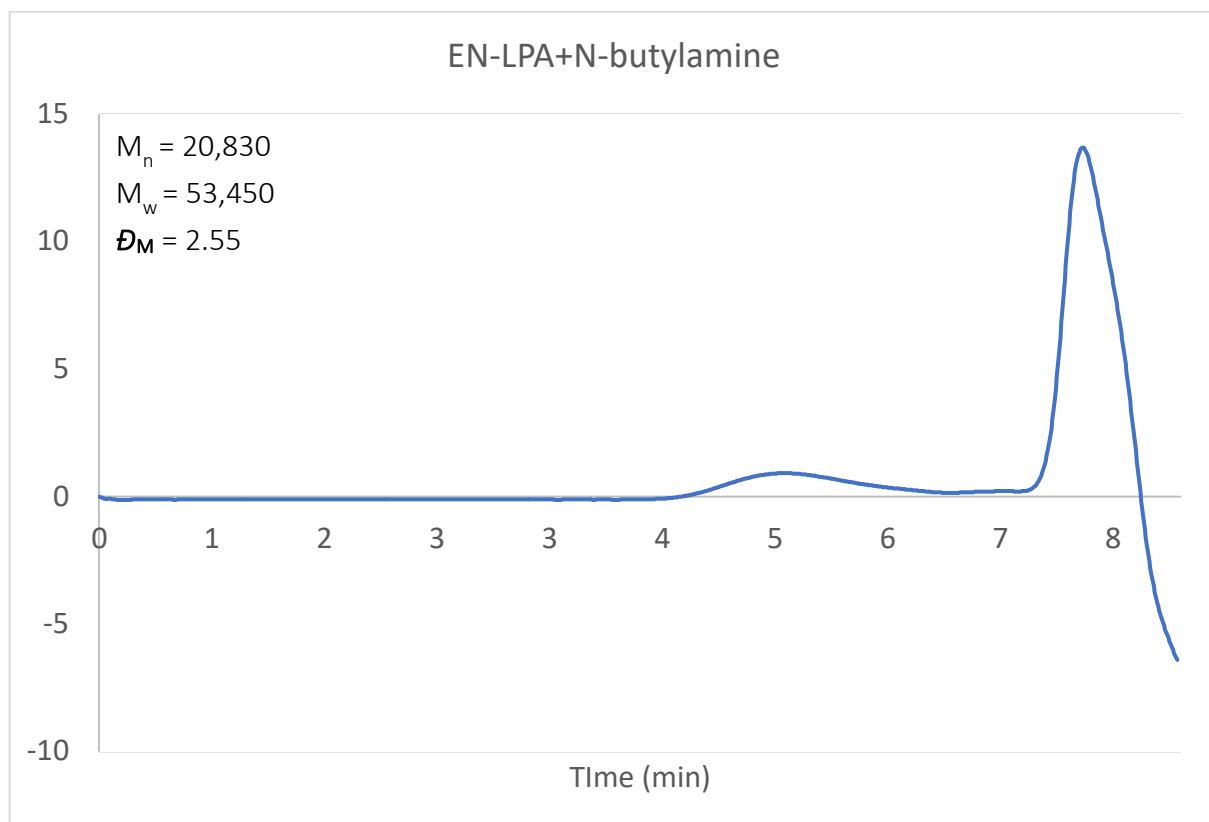

Figure S1. GPC results of LPA+butylamine elastomer **BuL-P** in THF.

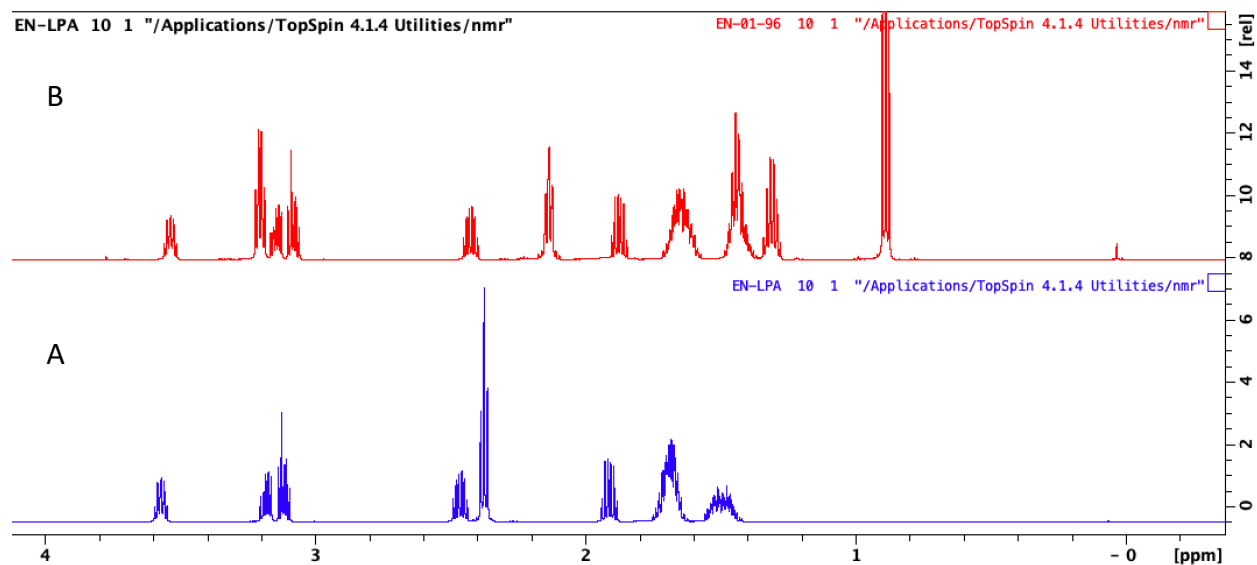

Figure S2. Confirms the complete reaction of LPA + butylamine: (A)  $^1\text{H}$  NMR of LPA starting material, (B)  $^1\text{H}$  NMR of LPA + butylamine product **BuL**.

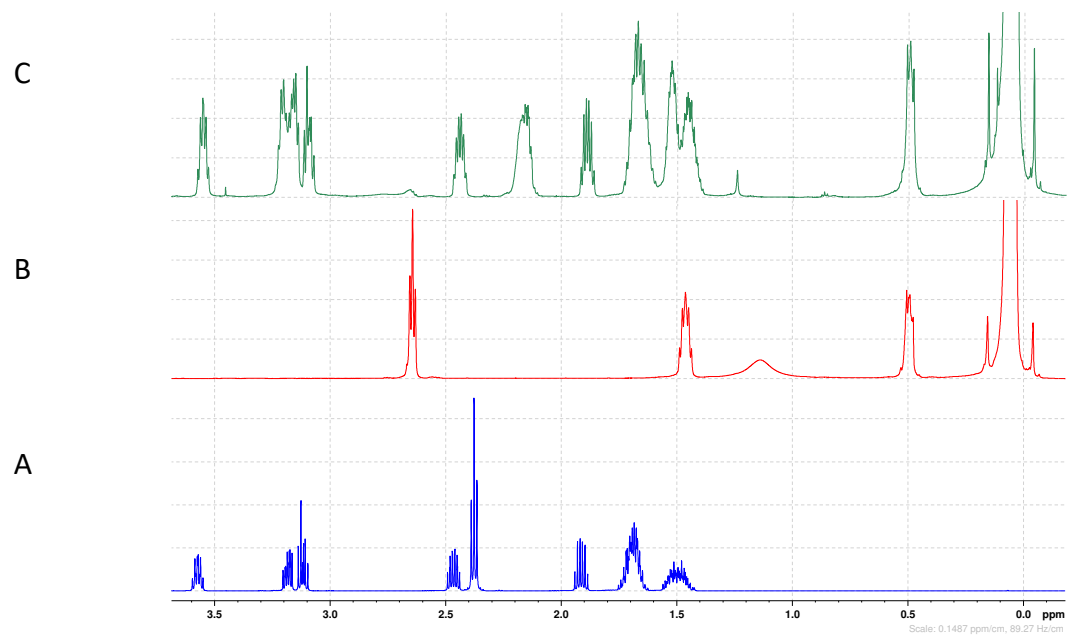

Figure S3. <sup>1</sup>H NMR comparison of LPA (A), APS(B) and LPA-APS copolymer(C).

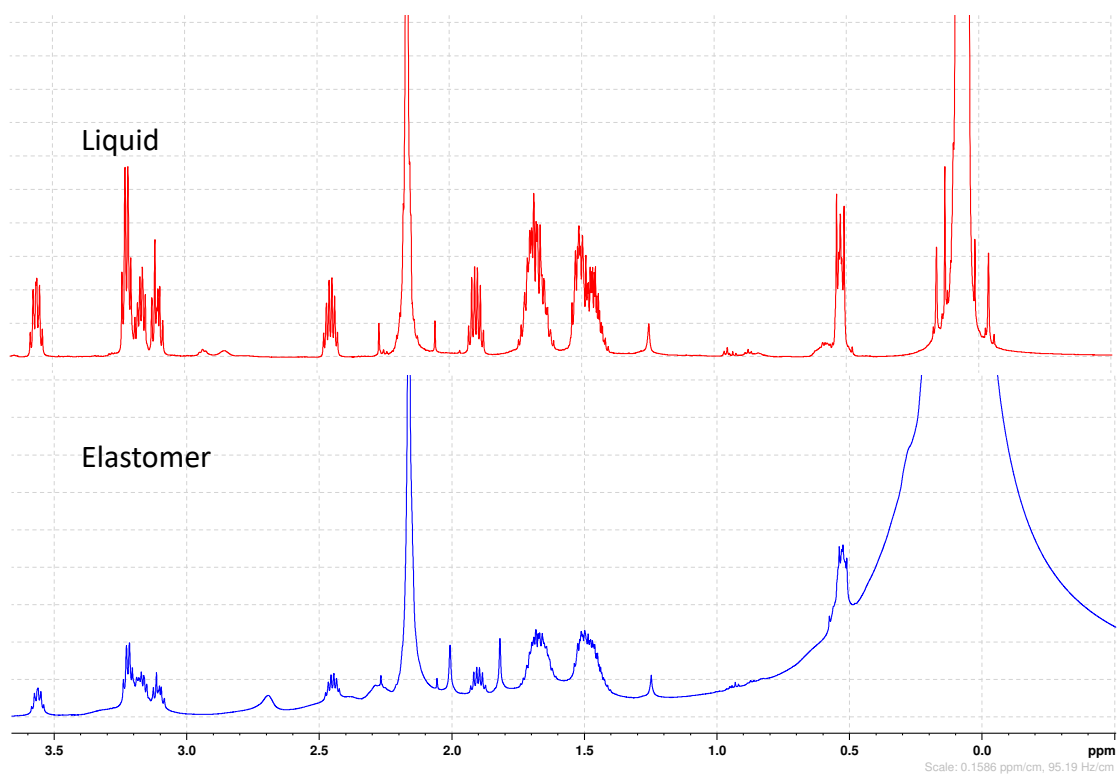

Figure S4. NMR of T8L, liquid vs elastomer.

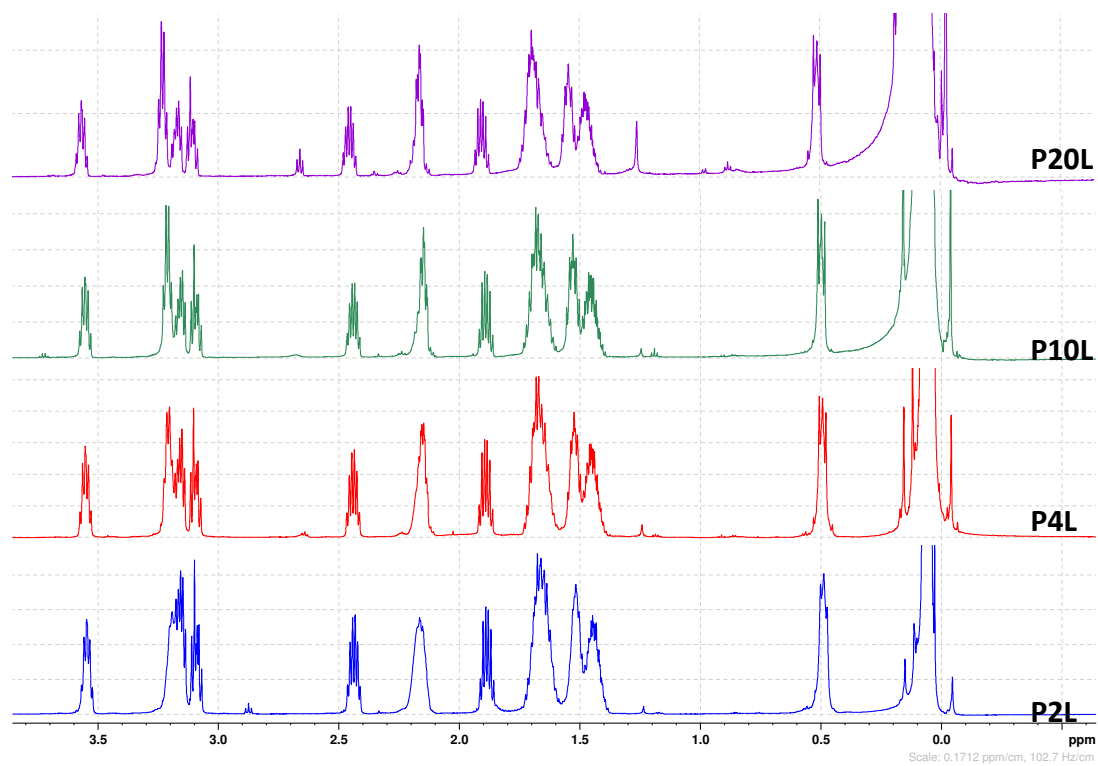

Figure S5. NMR of pendent LPA-APS co-polymer (before an elastomer had formed, within 10 minutes of reaction).



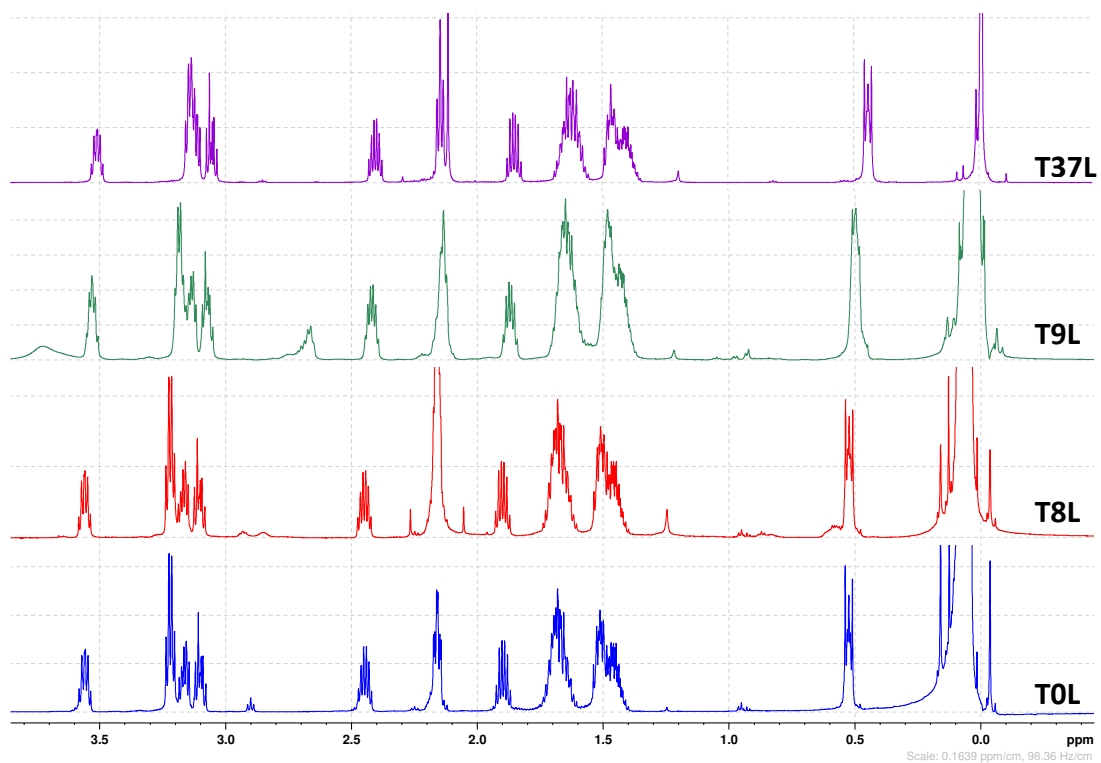

Figure S6. NMR of telechelic LPA-APS co-polymer (before an elastomer had formed, within 10 minutes of reaction).

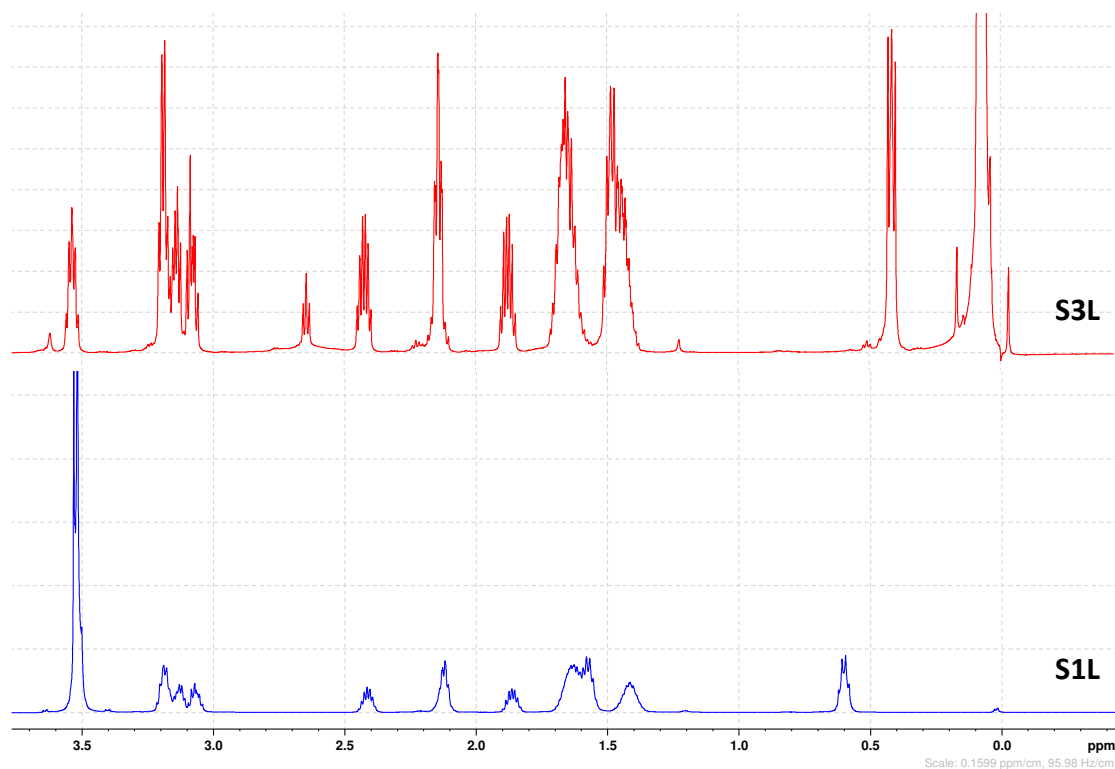

Figure S7. NMR of simple silanes LPA-APS co-polymer (before an elastomer had formed, within 10 minutes of reaction).

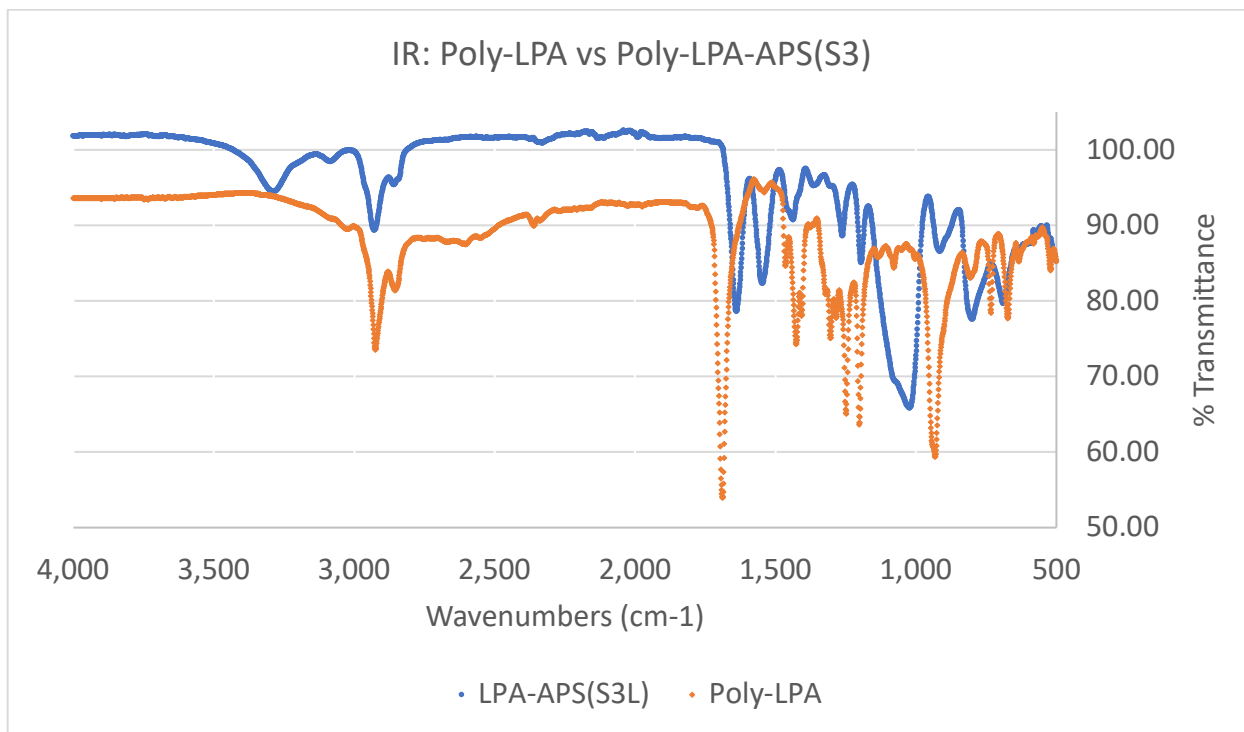

Figure S8. IR of LPA vs LPA-APS elastomer displays the shift in the carbonyl peak.

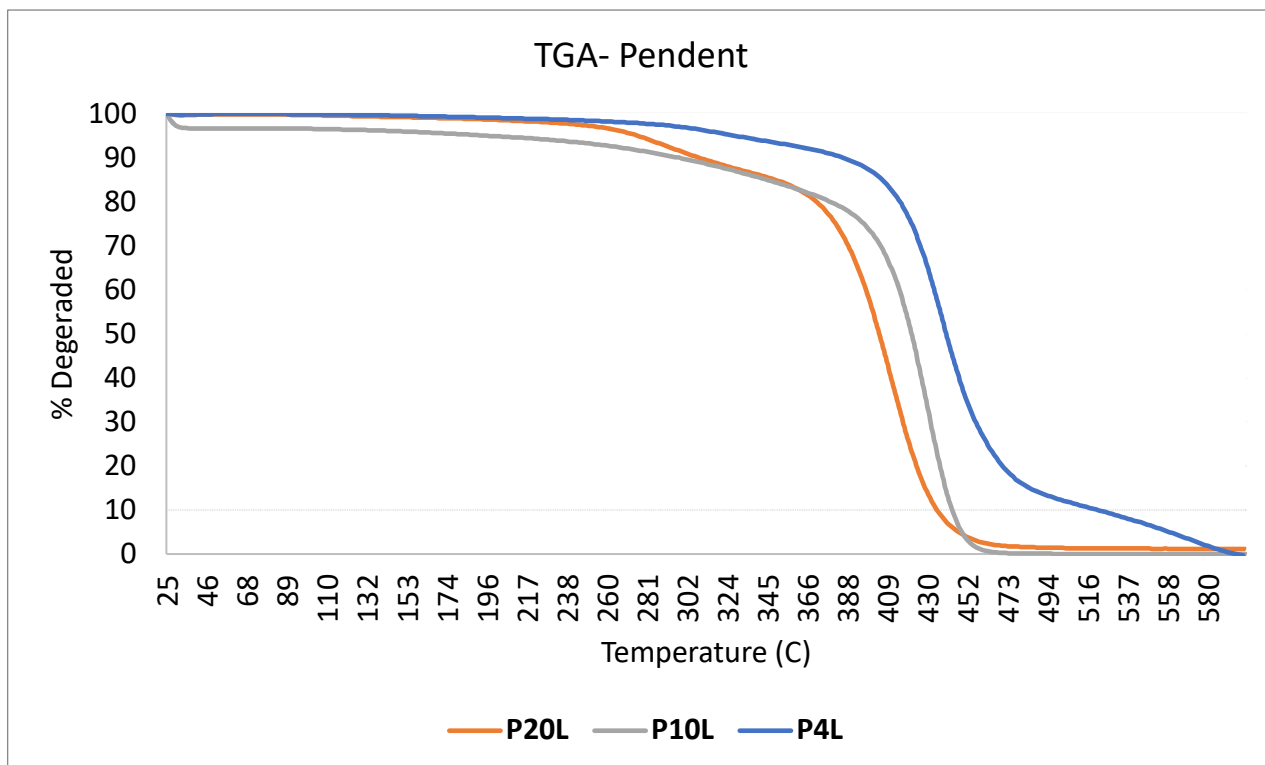

Figure S9. TGA of pendent LPA-APS elastomers.

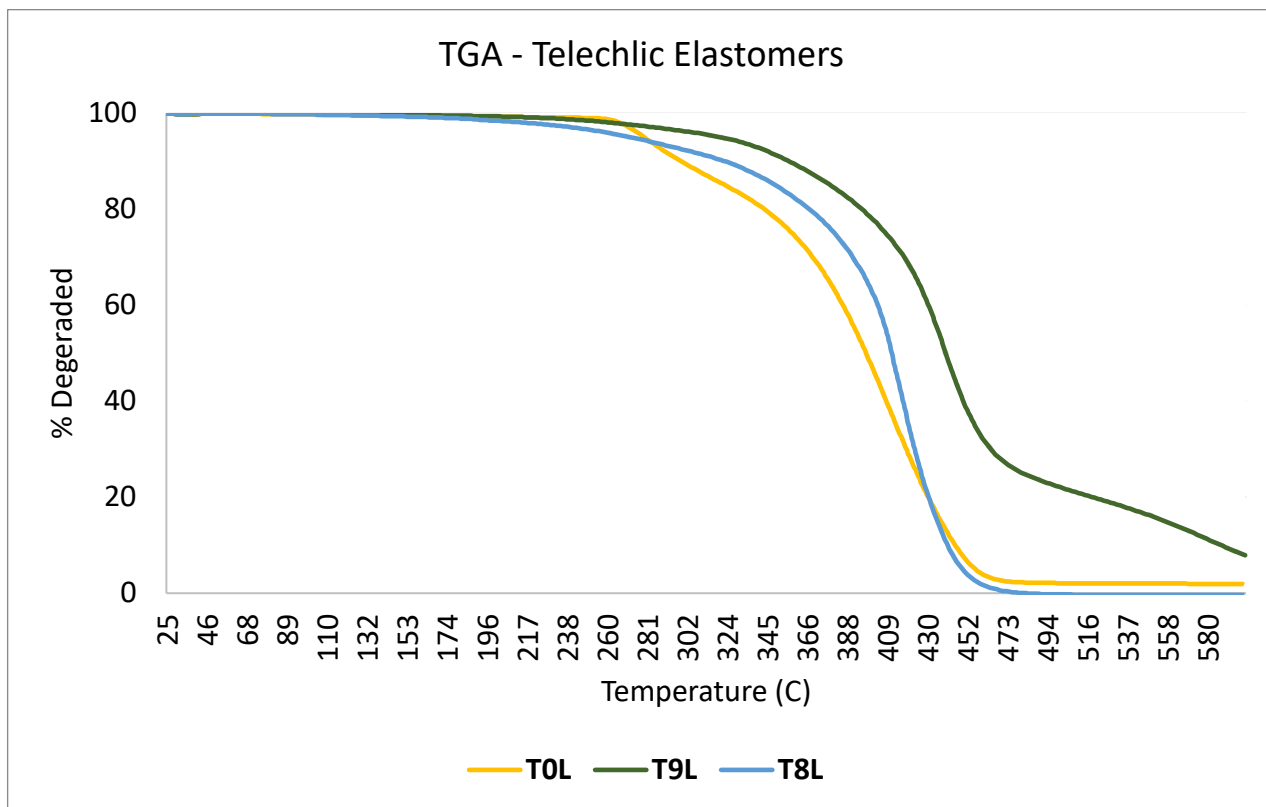

Figure S10. TGA of telechelic LPA-APS elastomers.

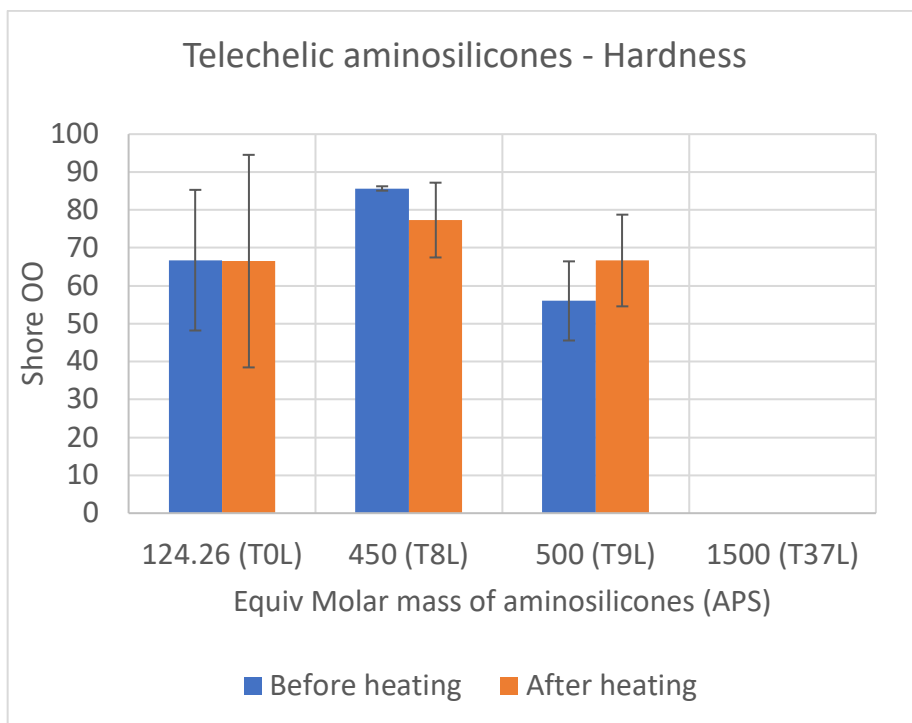

Figure S11. Shore hardness of linear LPA-APS elastomers; heating at melting point for 10 min.

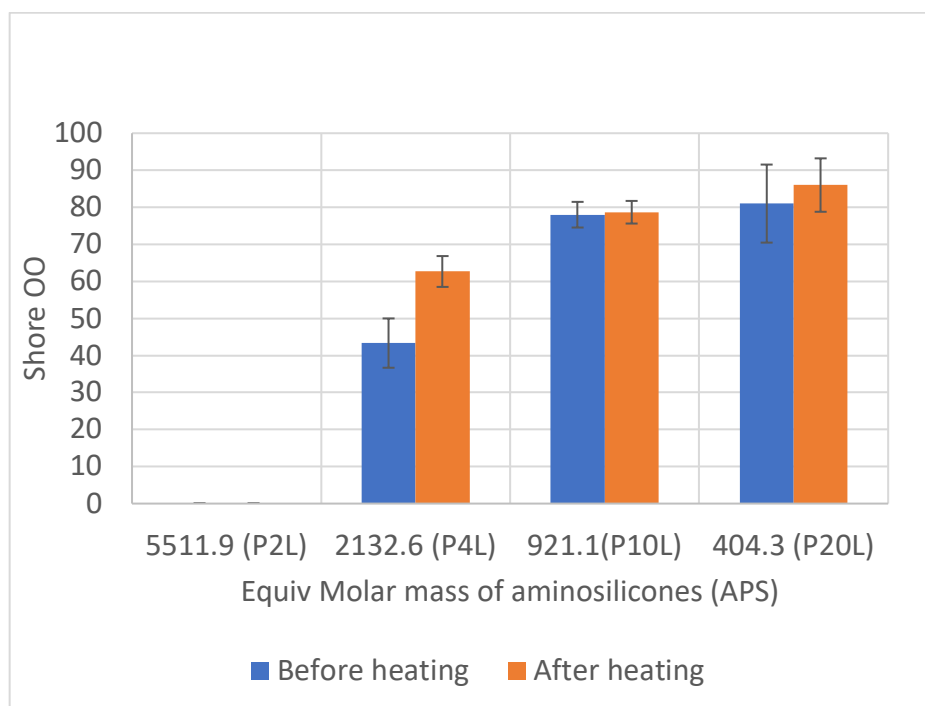

Figure S12. Shore hardness of pendent LPA-APS elastomers; heating at melting point for 10 min.

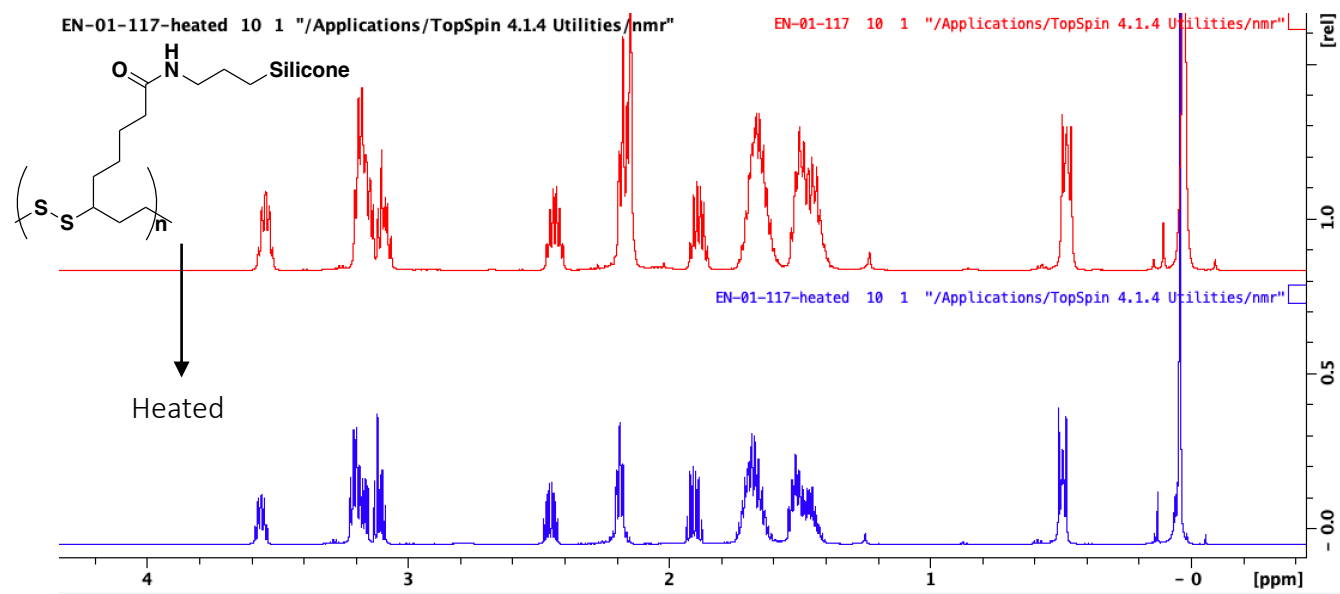

Figure S13. NMR of a linear telechelic LPA-APS copolymer (**T8L**, before it forms an elastomer) before and after heating.

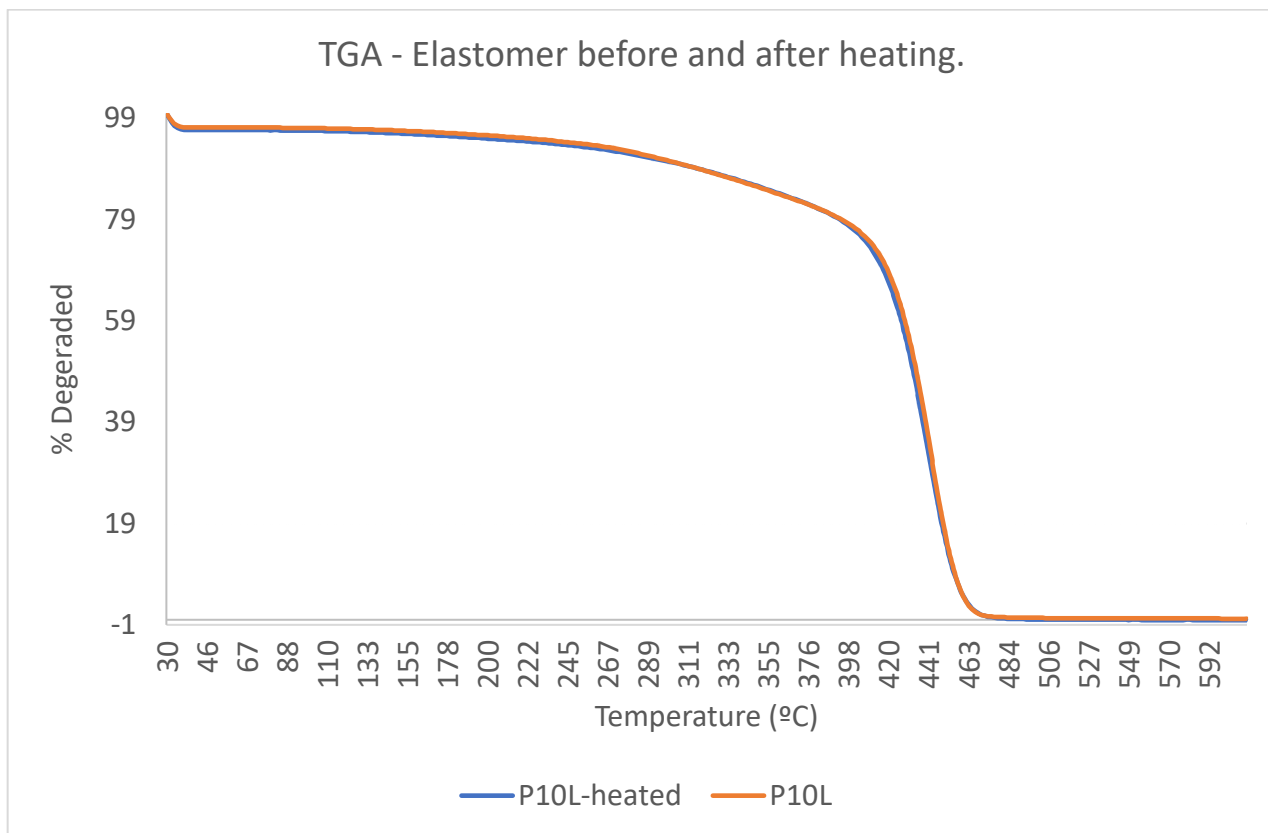

Figure S14. Comparison of the TGA of LPA-APS (**P10L**) before and after heating.

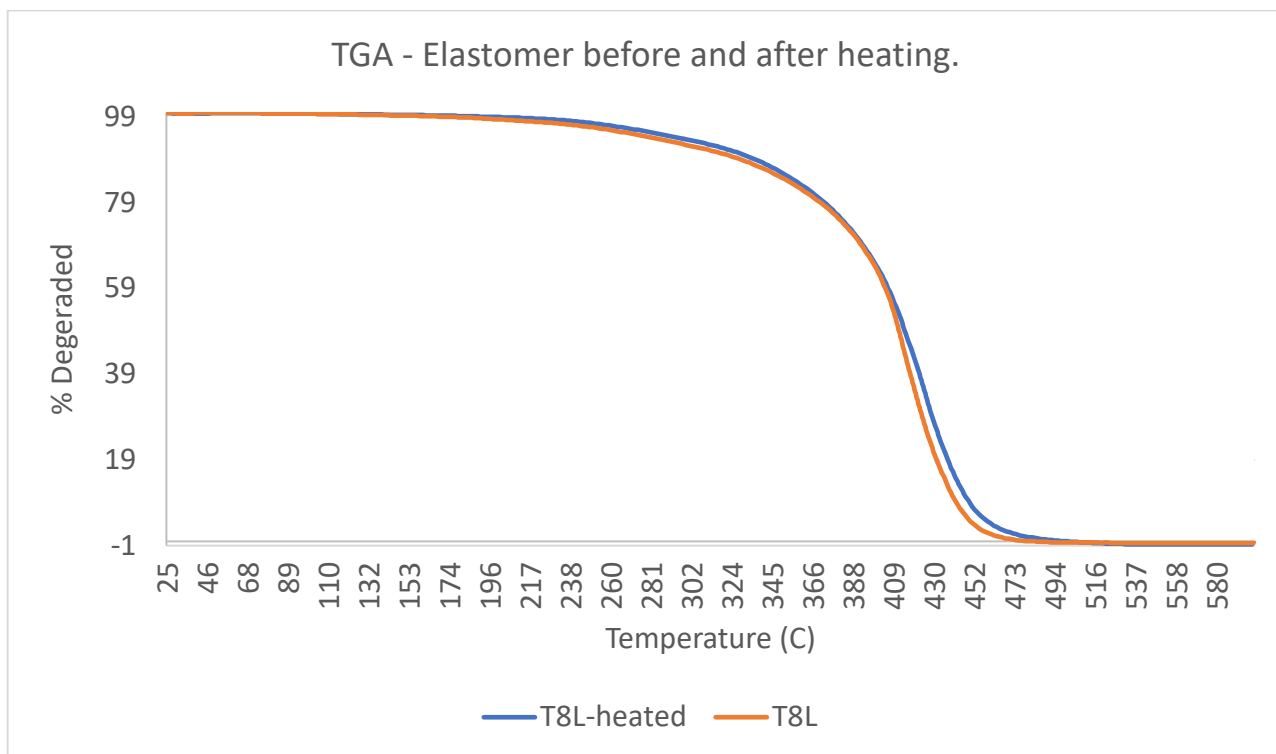

Figure S15. Comparison of the TGA of a telechelic LPA-APS (**T8L**) before and after heating.

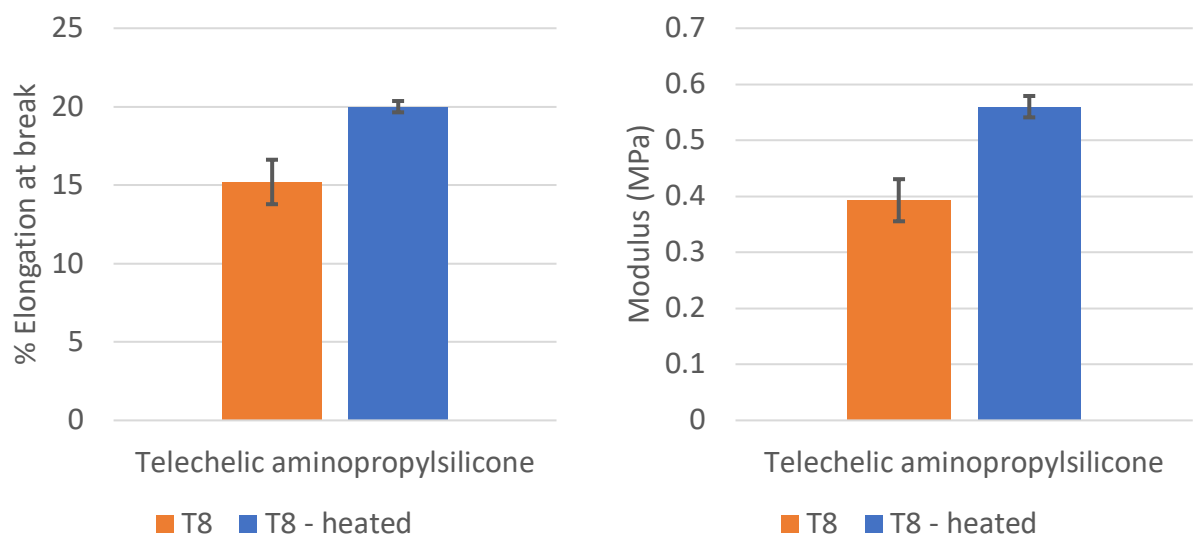

Figure S16. A: Elongation at break and Young’s modulus (tensile) of **T8L** before and after heating at the melting point (187 °C) for 10 min.

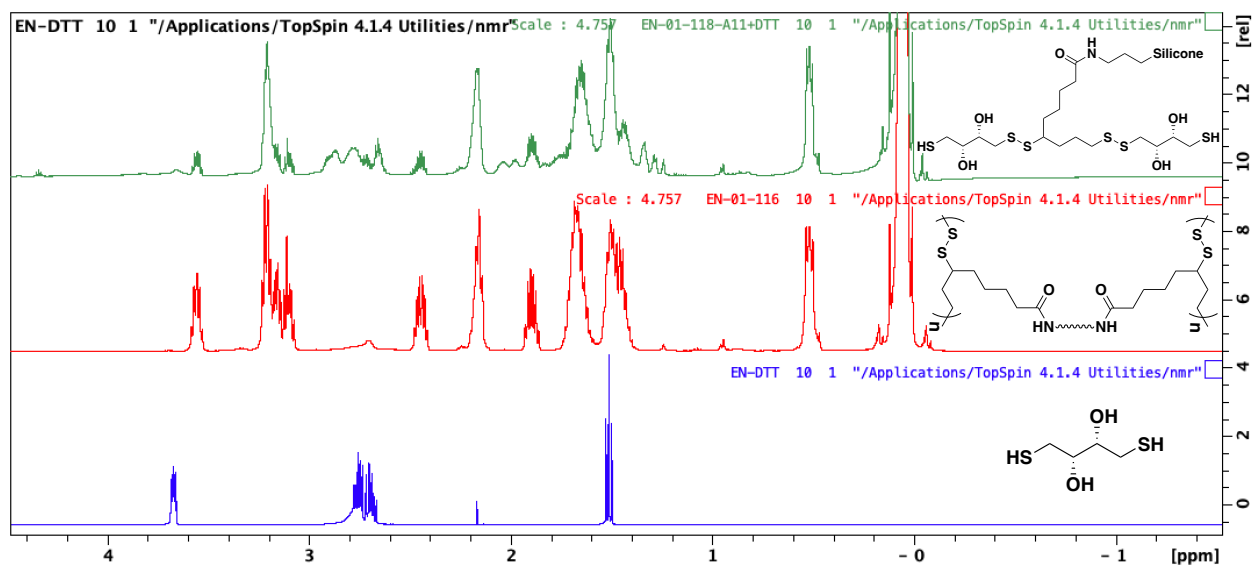

Figure S17. NMR of DTT, LPA-APS (telechelic) elastomer and Elastomer + DTT NMR.

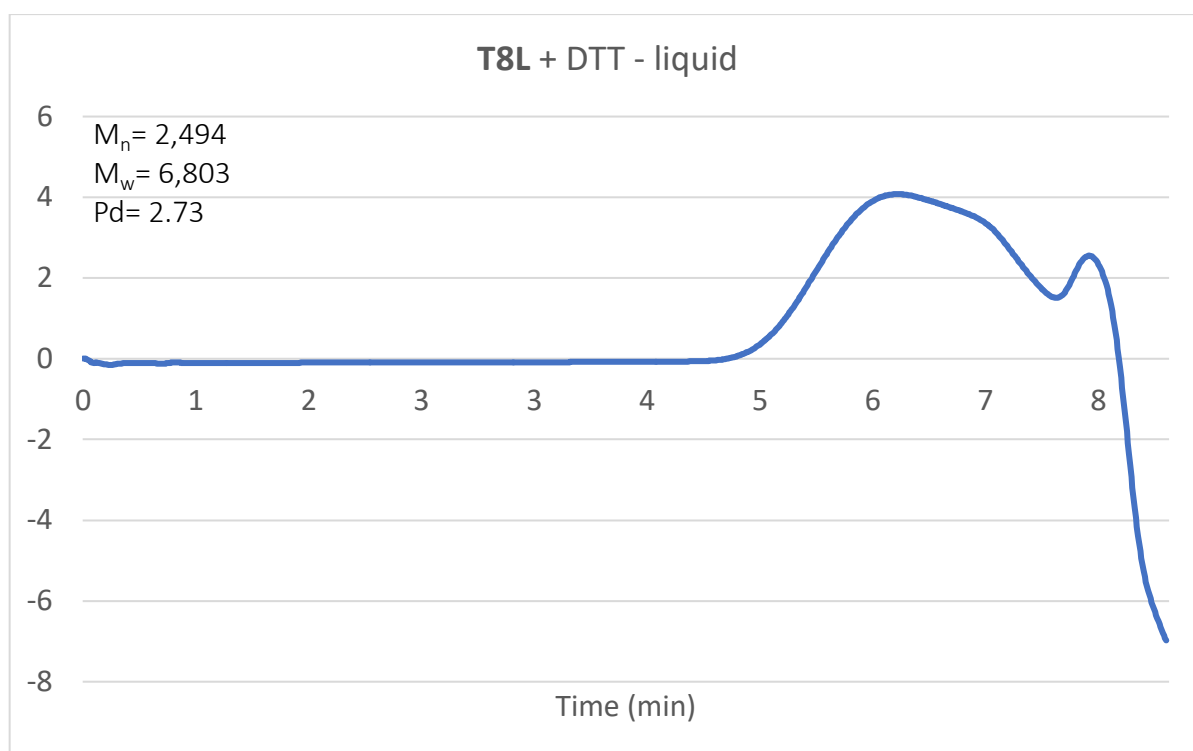

Figure S18. GPC results of LPA-APS (telechelic) elastomer + DTT product.

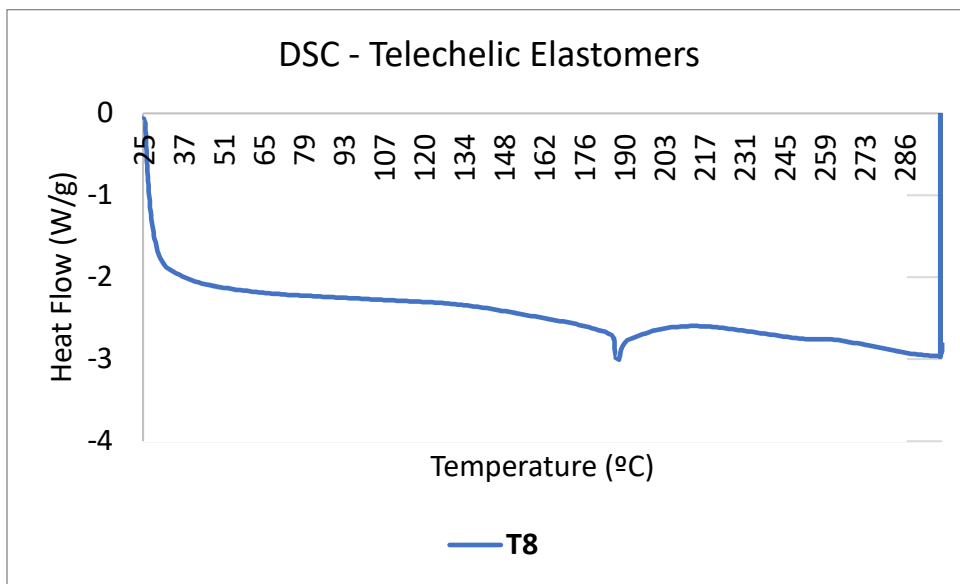

vs

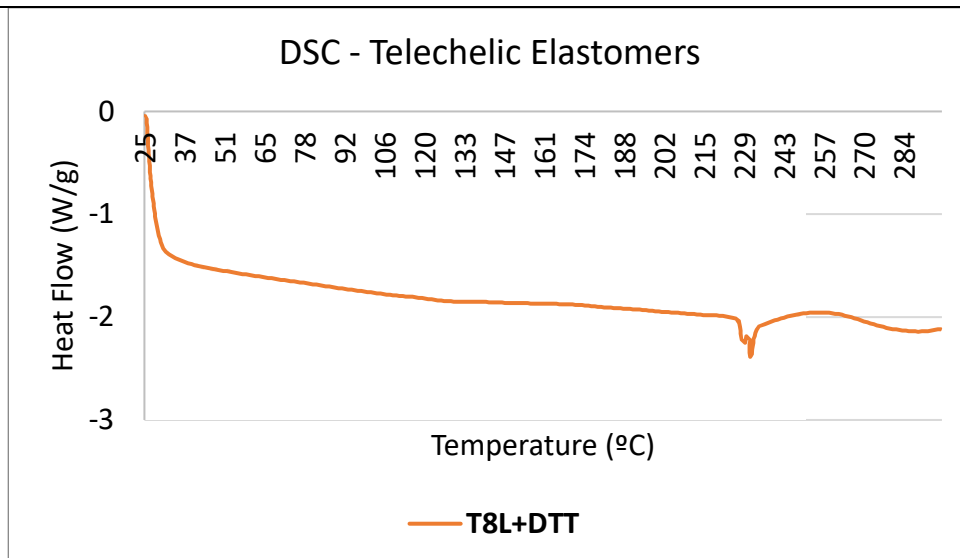

Figure S19. Comparison of LPA-APS elastomer before and after degradation with DTT.



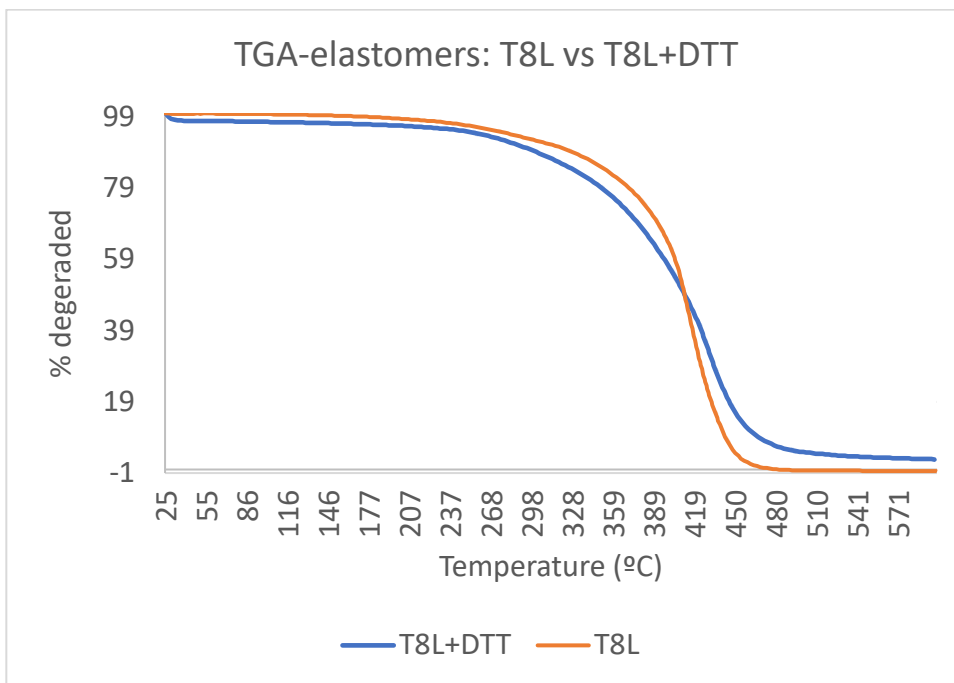

Figure S20. TGA results of **T8L** elastomer vs **T8L+DTT** elastomer.
